# **Right Ventricular Work and Pulmonary Capillary Wedge Pressure in Heart Failure with Preserved Ejection Fraction**

Running title : RV global wasted work and  $\Delta$ PCWP in HFpEF

Kuan-Chih Huang<sup>1,2</sup>, Ting-Tse Lin<sup>2,3</sup>, Cho-kai Wu<sup>2,3</sup>, Lung-Chun Lin<sup>2,3</sup>, Lian-Yu

Lin<sup>2,3</sup>

<sup>1</sup>Division of Cardiology, Department of Internal Medicine, National Taiwan University

Hospital Hsinchu Branch, Hsinchu, Taiwan.

<sup>2</sup>Department of Internal Medicine, College of Medicine, National Taiwan University,

Taipei, Taiwan.

<sup>3</sup>Division of Cardiology, Department of Internal Medicine, National Taiwan

University College of Medicine and Hospital, Taipei, Taiwan.

Corresponding Author:

Ting-Tse Lin, MD, PhD, Division of Cardiology, Department of Internal Medicine,

National Taiwan University College of Medicine and Hospital, No. 7, Chung-Shan

South Road, Taipei 100, Taiwan;

**NOTE: This preprint reports new research that has not been certified by peer review and should not be used to guide clinical practice.**

Phone: +886-972653620; Fax: +886-2-23951841;

Email: [aesculapius0214@gmail.com](mailto:aesculapius0214@gmail.com)

and

Cho-Kai Wu, MD, PhD, Division of Cardiology, Department of Internal Medicine,

National Taiwan University College of Medicine and Hospital, No. 7, Chung-Shan

South Road, Taipei 100, Taiwan;

Phone: +886-2-23123456 ext 65002; Fax: +886-2-23951841;

Email: [chokaiwu@gmail.com](mailto:chokaiwu@gmail.com)

**Word counts : 4120**

**Figure : 3**

**Table : 3**

1 **Abstract (276)**

2 **Background**

3 Symptoms of heart failure with preserved ejection fraction (HFpEF) are closely  
4 related to elevated pulmonary capillary wedge pressure (PCWP) during exercise.  
5 Understanding right ventricular (RV) myocardial work, using RV pressure–strain  
6 loops to assess RV function in HFpEF, is lacking. The study aims to evaluate the  
7 effectiveness of right ventricular myocardial work parameters in diagnosing HFpEF  
8 and their correlation with pulmonary capillary wedge pressure during exercise.

9 **Methods**

10 The study included patients who underwent invasive cardiopulmonary exercise tests,  
11 measuring pressures at rest and during exercise to identify HFpEF. Echocardiography  
12 assessed left and right ventricular parameters. RV myocardial work was calculated  
13 using strain-rate and pressure curves, matched with ECG data. RV global constructive  
14 work (RV GCW), RV global work index (RV GWI), RV global wasted work (RV  
15 GWW), and RV global work efficiency (RV GWE) were analyzed and compared with  
16 invasively measured PCWP at rest and peak exercise.

17 **Results**

18 Forty-one patients with adequate data were enrolled, with 21 diagnosed with HFpEF.  
19 No significant differences in various echocardiographic parameters were found

20 between HFpEF and non-HFpEF groups, except higher post-exercise PCWP and  
21 mean pulmonary artery pressure in HFpEF patients. HFpEF patients had higher RV  
22 GWW and lower RV GWE. RV GWW and RV GWE had higher predictive ability for  
23 HFpEF diagnosis compared to other echocardiographic parameters. RV GCW ( $r =$   
24  $0.504$ ,  $P = 0.001$ ) and RV GWW ( $r = 0.621$ ,  $P < 0.001$ ) correlated with post-exercise  
25  $\Delta$ PCWP and exercise PCWP, with RV GWW independently associated with both after  
26 adjustment for confounding factors.

## 27 **Conclusions**

28 RV GWW is a novel predictive parameter that provides a better explanation of RV  
29 performance regarding post-exercise  $\Delta$ PCWP than other standard echocardiographic  
30 parameters in HFpEF.

31 **Keywords** : RV myocardial work, RV global wasted work, HFpEF,  $\Delta$ PCWP

32

33

34

35

36

37

38

## 39 **WHAT IS NEW?**

- 40 1. Right ventricular global wasted work (RV GWW) is identified as a novel  
41 predictive parameter in heart failure with preserved ejection fraction (HFpEF),  
42 providing a more accurate explanation of right ventricular (RV) performance  
43 regarding post-exercise changes in pulmonary capillary wedge pressure ( $\Delta$ PCWP)  
44 compared to standard echocardiographic parameters.
- 45 2. This study highlights the significant correlation of RV GWW with post-exercise  
46  $\Delta$ PCWP and exercise PCWP, demonstrating its independent association after  
47 adjusting for confounding factors.
- 48 3. RV myocardial work, assessed using RV pressure–strain loops from invasive  
49 cardiopulmonary exercise tests and echocardiography, offers valuable insights into the  
50 role of RV in exercise intolerance and dyspnea among HFpEF patients.

## 51 **WHAT ARE THE CLINICAL IMPLICATIONS?**

- 52 1. RV GWW serves as a superior predictive marker for diagnosing HFpEF,  
53 independently correlating with post-exercise  $\Delta$ PCWP. This enhances the  
54 understanding of RV contribution to exercise intolerance and dyspnea in HFpEF,  
55 potentially aiding in more accurate diagnosis and tailored management strategies.
- 56 2. Incorporating RV GWW analysis in clinical practice may improve the diagnostic  
57 precision and management of HFpEF, optimizing treatment strategies for patients with

58 unexplained dyspnea and suspected HFpEF.

59

60 **Nonstandard Abbreviations and Acronyms**

61  $\Delta$ PCWP: Change in Pulmonary Capillary Wedge Pressure

62 GCW: Global Constructive Work

63 GWE: Global Work Efficiency

64 GWI: Global Work Index

65 GWW: Global Wasted Work

66 HFpEF: Heart Failure with Preserved Ejection Fraction

67 HFrEF: Heart Failure with Reduced Ejection Fraction

68 iCPET: Invasive Cardiopulmonary Exercise Test

69 IVCT: Isovolumic Contraction Time

70 IVRT: Isovolumic Relaxation Time

71 LAV: Left Atrial Volume

72 LAVI: Left Atrial Volume Index

73 LASb: Left Atrial Booster Strain

74 LASc: Left Atrial Conduit Strain

75 LASr: Left Atrial Reservoir Strain

76 LV: Left Ventricle / Left Ventricular

- 77 LVEDP: Left Ventricular End-Diastolic Pressure
- 78 LVEDV: Left Ventricular End-Diastolic Volume
- 79 LVESV: Left Ventricular End-Systolic Volume
- 80 LVGLS: Left Ventricular Global Longitudinal Strain
- 81 LVEF: Left Ventricular Ejection Fraction
- 82 LVSV: Left Ventricular Stroke Volume
- 83 NT-proBNP: N-terminal pro B-type Natriuretic Peptide
- 84 PA: Pulmonary Artery
- 85 PAP: Pulmonary Artery Pressure
- 86 PCWP: Pulmonary Capillary Wedge Pressure
- 87 RA: Right Atrium / Right Atrial
- 88 RV: Right Ventricle / Right Ventricular
- 89 RVEDA: Right Ventricular End-Diastolic Area
- 90 RVESA: Right Ventricular End-Systolic Area
- 91 RVFAC: Right Ventricular Fractional Area Change
- 92 RVFWS: Right Ventricular Free Wall Strain
- 93 RVGCW: Right Ventricular Global Constructive Work
- 94 RVGLS: Right Ventricular Global Longitudinal Strain
- 95 RVGWE: Right Ventricular Global Work Efficiency

- 96 RVGWI: Right Ventricular Global Work Index
- 97 RVGWW: Right Ventricular Global Wasted Work
- 98 RVMW: Right Ventricular Myocardial Work
- 99 SV: Stroke Volume
- 100 SVi: Stroke Volume Index
- 101 TAPSE: Tricuspid Annular Plane Systolic Excursion



## 102 INTRODUCTION

103 Heart Failure with Preserved Ejection Fraction (HFpEF) has surpassed Heart  
104 Failure with Reduced Ejection Fraction (HFrEF) in terms of prevalence. However,  
105 owing to its heterogeneous etiology, the diagnosis of HFpEF is more challenging <sup>1</sup>.  
106 Cardiologists rely on clinical demographics, laboratory biomarkers, comprehensive  
107 echocardiography and functional studies for disease stratification. Although  
108 pulmonary hypertension and right ventricular dysfunction are anticipated in HFpEF <sup>2-4</sup>,  
109 invasive Cardiopulmonary Exercise Test (iCPET) is still frequently needed to unmask  
110 the elevated left ventricular (LV) filling pressure in equivocal patients <sup>5,6</sup>. Patients  
111 presented as dyspnea of unknown etiology could have normal pulmonary capillary  
112 wedge pressure (PCWP) at rest but suffer from increases in PCWP during exercise.  
113 The difference between PCWP measured during exercise and rest ( $\Delta$ PCWP) is an  
114 important indicator of heart function, and a higher  $\Delta$ PCWP was associated with a  
115 higher mortality rate <sup>7,8</sup>. Our previous work revealed that exercise left atrial conduit  
116 strain was highly associated with  $\Delta$ PCWP <sup>9</sup>; however, rest echocardiography  
117 parameters predicting such hemodynamic change is lacking.

118

119 Myocardial work is a recent emerging concept that integrates information on  
120 pressure and myocardial strain throughout the entire cardiac cycle <sup>10,11</sup>. In addition to

121 the overall ventricular work index, this concept further delineates the notions of  
122 constructive work, wasted work, and work efficiency. Unlike global longitudinal  
123 strain and ejection fraction, which are limited by afterload dependency, myocardial  
124 work is considered a promising tool to detect incipient LV systolic dysfunction in  
125 aortic stenosis <sup>12</sup>. Due to the thinner walls and lower ventricular elastance of the right  
126 ventricle (RV), RV longitudinal strain is even more afterload dependent <sup>13,14</sup>. Recently,  
127 a proof-of-concept study demonstrated a significant correlation of RV myocardial  
128 work (RVMW) with invasively measured stroke volume and stroke volume index in a  
129 HFrEF population <sup>15</sup>. Such technique should have considerable potential for detecting  
130 early RV dysfunction in patients with HFpEF.

131

132 Since the currently available non-invasive method for assessing myocardial work  
133 is still vendor-specific <sup>16</sup>, and because right ventricular pressures are naturally lower  
134 than left ventricular pressures, the margin of error when estimating RV pressures  
135 using modified Bernoulli equation could impacts the results more in HFpEF than in  
136 HFrEF or pulmonary hypertension. The aim of this study is to design a semi-invasive  
137 RVMW method by combining the pressure recordings from Swan-Ganz catheter with  
138 strain results via echocardiography. We also investigate relationship between the  
139 values of RVMW and the results of iCPET for better understanding of the RV

140 pathophysiology in HFpEF.

141

142 **MATERIAL AND METHODS**

143

144 **Study population**

145 Patients presenting with dyspnea of unknown etiology were recruited for this  
146 study upon the diagnosis of HFpEF. HFpEF was defined according to the 2016  
147 ASE/EACVI HF criteria, characterized by the following criteria: (1) typical  
148 symptoms and signs of heart failure; (2) left ventricular ejection fraction (LVEF)  
149  $\geq 50\%$ ; (3) elevated NT-proBNP levels ( $\geq 125$  pg/mL); and (4) echocardiographic  
150 evidence of structural abnormalities (left atrial volume index  $> 34$  mL/m<sup>2</sup> or left  
151 ventricular mass index  $\geq 115$  g/m<sup>2</sup> for men and  $\geq 95$  g/m<sup>2</sup> for women) or functional  
152 abnormalities (E/e' ratio  $\geq 13$  and mean e' velocity of septal and lateral wall  $< 9$  cm/s).  
153 Exclusion criteria included chronic renal failure (creatinine  $> 250$   $\mu$ mol/L), significant  
154 hepatic disease, significant coronary artery disease ( $\geq 70\%$  coronary artery stenosis  
155 without intervention or positive stress test), secondary hypertension, pericardial  
156 disease, significant valvular heart disease ( $>$ mild stenosis and  $>$ moderate  
157 regurgitation), cancer, cor pulmonale, congenital heart disease, left-to-right shunt,  
158 myocardial infarction within 60 days, high-output heart failure, and chronic atrial  
159 fibrillation. This study complied with the Declaration of Helsinki and received  
160 approval from the institutional review board of the National Taiwan University

161 Hospital (201908057RINC). Informed consent was obtained from all participants  
162 prior to inclusion in the study. The patient enrollment algorithm is shown in  
163 Supplemental Figure 1. For subjects (N=41) with complete echocardiography and  
164 iCPET examination, HFpEF (N=21) diagnosis was confirmed if resting pulmonary  
165 capillary wedge pressure (PCWP) was  $\geq 15$  mm Hg or exercise-induced PCWP was  
166  $\geq 25$  mm Hg.

167

#### 168 **Invasive cardiopulmonary exercise test**

169 A 7-F Swan–Ganz catheter (Biosensors International) was inserted into the  
170 pulmonary artery via the internal jugular vein sheath. Before and after a constant  
171 20-W workload for 6 min on an electromagnetically braking cycle ergometer  
172 (Ergometrics ER800, Ergoline GmbH), patients underwent right cardiac  
173 catheterization at rest and during supine exercise<sup>17,18</sup>. Transducers were zeroed at the  
174 mid-axilla. Right atrial (RA) pressure (RAP), pulmonary artery (PA) pressure (PAP),  
175 and PCWP were recorded at end-expiration. Mean RAP and PCWP were recorded at  
176 mid A wave. Patients met the criteria of resting PCWP  $> 15$  mmHg and post-exercise  
177 PCWP  $> 25$  mmHg were considered as HFpEF in the present study.

178

179

## 180 **Echocardiography**

181 The 2D echocardiographic data set was acquired right before the invasive  
182 cardiopulmonary exercise test using a CX50 xMATRIX system equipped with an  
183 S5-1 transducer (Philips Medical Systems, Andover, MA) and stored digitally for  
184 offline analysis with dedicated software (TTA 2.3 Cardiac performance analysis,  
185 TomTec Imaging Systems, Unterschleißheim, Germany). LV apical 4-chamber,  
186 2-chamber, and 3-chamber views were used to calculate the left ventricular  
187 end-diastolic volume (LVEDV), left ventricular end-systolic volume (LVESV) as well  
188 as the consequent left ventricular stroke volume (LVSV), left ventricular ejection  
189 fraction (LVEF), left ventricular global longitudinal strain (LVGLS), left atrial volume  
190 (LAV), left atrial reservoir strain (LASr), left atrial conduit strain (LASc) and left  
191 atrial booster strain (LASb). RV focused views were analyzed for RV end-diastolic  
192 area (RVEDA), RV end-systolic area (RVESA), RV fractional area change (RVFAC),  
193 RV global longitudinal strain (RVGLS), RV free wall strain (RVFWS) and tricuspid  
194 annular plane systolic excursion (TAPSE). Doppler and tissue doppler  
195 echocardiograms were used to calculate early (E) and late (A) diastolic transmitral  
196 velocities and mean E/e' ratios. All the echocardiographic analyses were performed by  
197 an independent cardiologist who did not involve the image acquisition and was blind  
198 to the clinical data.

## 199 **Calculation of right ventricular myocardial work**

200       The RVGLS derived strain rate-to-time curves were exported as .xml files via the  
201 dedicated software. A Swan-Ganz catheter was delivered into the RV apex during  
202 ICPEPT and the RV pressure curves were exported as .xml files along with  
203 electro-cardiography (ECG) tracings using a commercially available hemodynamic  
204 recording system (Mac-Lab Cardiac Cath Lab Physiological Recording System, GE  
205 Healthcare, Milwaukee, U.S.A.). Because the ventricular pressure was recorded but  
206 not estimated, we did not use the doppler defined timing (aortic valve opening, aortic  
207 valve closure, mitral valve opening, mitral valve closure) to match the RV strain-rate  
208 and RV pressure curves; instead, we used the ECG to conjugate the RV strain-rate and  
209 RV pressure curves (Figure 1). RV Global work index (GWI), global constructive  
210 work (GCW), global waste work (GWW) and global work efficiency (GWE) were  
211 defined as their left ventricular counterparts<sup>19</sup>.

212

213

## 214 RESULTS

215 Table 1 summarized the demographic characteristics, medication and basic  
216 laboratory data, and there was no significant difference between HFpEF and  
217 non-HFpEF groups.

218

### 219 *Echocardiographic parameters (Table 2)*

220 HFpEF groups had higher rest PCWP ( $21.2 \pm 6.4$  vs.  $12.9 \pm 3.4$  mmHg,  $p < 0.01$ ),  
221 higher post-exercise PCWP ( $28.6 \pm 8.2$  vs.  $18.9 \pm 4.6$  mmHg,  $p < 0.01$ ), higher mean PAP  
222 ( $28.1 \pm 7.4$  vs.  $20.5 \pm 4.9$  mmHg,  $p < 0.01$ ) and higher post exercise men PAP ( $39.6 \pm 8.5$   
223 vs.  $32.1 \pm 8.2$  mmHg,  $p < 0.01$ ).

224 For left heart echocardiographic parameters, there was no significant difference  
225 in LVEDV ( $86.2 \pm 20.0$  vs.  $74.3 \pm 22.6$  ml,  $p = 0.08$ ), LVEF ( $66.7 \pm 8.1$  vs.  $65.4 \pm 7.3$  %,  $p = 0.57$ ), LVGLS ( $22.7 \pm 3.1$  vs.  $20.2 \pm 11.3$ ,  $p = 0.33$ ), mean E/e' ( $11.3 \pm 4.8$  vs.  $9.3 \pm 2.4$ ,  
226  $p = 0.11$ ), LAV ( $52.1 \pm 21.3$  vs.  $47.1 \pm 14.3$  ml,  $p = 0.38$ ), LASr ( $39.1 \pm 11.3$  vs.  $44.7 \pm 8.2$  %,  $p = 0.07$ ), LASc ( $20.3 \pm 7.0$  vs.  $22.3 \pm 6.7$  %,  $p = 0.35$ ), and LASb ( $18.7 \pm 7.3$  vs.  $22.4 \pm 7.4$  %,  $p = 0.12$ ).

230 For right heart echocardiographic parameters, there was no significant difference  
231 in RVEDA ( $16.9 \pm 4.3$  vs.  $15.9 \pm 4.1$  cm<sup>2</sup>,  $p = 0.44$ ), RVFAC ( $38.3 \pm 9.7$  vs.  $41.3 \pm 5.5$  %,  $p = 0.25$ ), RVGLS ( $22.8 \pm 4.7$  vs.  $23.9 \pm 2.9$  %,  $p = 0.39$ ), RVFWS ( $25.8 \pm 5.4$  vs.  $27.5 \pm 3.9$



233 %,  $p=0.29$ ), TAPSE ( $2.4\pm 0.5$  vs.  $2.3\pm 0.4$  cm,  $p=0.53$ ), RVFWS/PASP ( $1.4\pm 1.0$  vs.  
234  $1.3\pm 0.6$  %/mmHg,  $p=0.73$ ), and TAPSE/PASP ( $1.0\pm 0.3$  vs.  $1.2\pm 0.7$  cm/mmHg,  
235  $p=0.57$ ).

236

### 237 ***Right ventricular myocardial work analysis (Table 2 and Figure 2)***

238 For right ventricular myocardial work analysis, there was no significant  
239 difference in RVGCW ( $547.6\pm 229.1$  vs.  $490.1\pm 118.9$  mmHg%,  $p=0.33$ ). But HFpEF  
240 groups had higher RV GWW ( $255.6\pm 96.0$  vs.  $149.6\pm 63.3$  mmHg%,  $p<0.01$ ) and  
241 lower RV GWE ( $67.7\pm 6.8$  vs.  $76.9\pm 6.7\%$ ,  $p<0.01$ ).

242 **Figure 3** reveals that RV GWW is significantly correlated with rest PCWP  
243 ( $r=0.48$ ,  $p<0.01$ ), post-exercise  $\Delta$ PCWP ( $r=0.41$ ,  $p<0.01$ ), but not LVSVi ( $r=-0.24$ ,  
244  $p=0.13$ ) or cardiac index ( $r=-0.05$ ,  $p=0.76$ ).

245

### 246 ***Prediction of HFpEF with echocardiographic parameters (Table 3)***

247 To predict the diagnosis of HFpEF via iCPET, the RV GWW and RV GWE had  
248 higher AUC (0.84 and 0.83, respectively) than mean E/e' (AUC 0.59), LASr (AUC  
249 0.64), RVFAC (AUC 0.61), TAPSE/PASP (AUC 0.50) and RVFWS/PASP (AUC  
250 0.52).

251 We also examined the relationship of echocardiographic parameters and RV

252 myocardial work with post-exercise  $\Delta$ PCWP and exercise PCWP (Supplemental Table  
253 1). LASb was negatively correlated and RV GCW and GWW were positively  
254 correlated with post-exercise  $\Delta$ PCWP. LASr, LASb and RV GWE were negatively  
255 correlated with exercise PCWP. And mean  $E/e'$ , RV GCW and GWW were positively  
256 correlated with exercise PCWP.

257 We performed multivariate analysis to control for possible confounding factors  
258 (Table 4), including age, LVGLS, LAVi, LASc and mean  $E/e'$ . The  $\beta$  coefficient for  
259 every 100 mmHg% of RV GWW was 1.981 (0.056~3.906,  $p=0.044$ ) for post-exercise  
260  $\Delta$ PCWP and 4.323 (2.429~6.218,  $p<0.001$ ) for exercise PCWP after adjustment.

261 **DISCUSSION**

262 Exercise intolerance and dyspnea in patients with HFpEF can be attributed to  
263 exercise-induced dynamic congestion caused by rapidly increased PCWP. The  
264 elevated afterload and RV dysfunction sustain challenges to cardiac dynamics through  
265 an unfavorable RV to LV diastolic interaction<sup>20</sup>. The present study suggests that  
266 pressure-strain loop analysis of RVMW improves the accuracy of HFpEF diagnosis.  
267 Compared with echocardiographic parameters such as averaged E/e', LAVI, and strain,  
268 RV GWW and RV GWE demonstrate better predictive ability for diagnosing HFpEF.  
269 Additionally, increased RV GWW is significantly correlated with PCWP and  $\Delta$ PCWP  
270 during exercise. Pressure-strain loop analysis of our HFpEF cohort provides insights  
271 into understanding the pathophysiology of patients with HFpEF.

272

273 ***Application of myocardial work in RV pathophysiology.***

274 The right ventricle is no longer a forgotten chamber. Whenever a new assessment  
275 method for the LV emerges, it is quickly extrapolated for RV application. Techniques  
276 such as 3D volumetric RVEF, speckle tracking deformational analysis for RV  
277 longitudinal strain, and ventricular arterial coupling concepts now have RV-specific  
278 versions (i.e. TAPSE/PASP, RVFWS/PASP). These traditional parameters typically  
279 represent changes in the heart from end-systole to end-diastole, which are useful for

280 the LV, a pumping chamber, but not entirely suitable for the RV, a peristalsis conduit  
281 chamber. The pulmonary artery Doppler w-shape in pulmonary hypertension and the  
282 delay in RV peak pressure or contraction<sup>21,22</sup> both underscore the need to consider  
283 temporal effects and such unique mechanics in RV function evaluation.

284 Pressure-strain analysis is a remarkable invention. Unlike pressure-volume  
285 analysis, by differentiating strain into strain rate, more inflection points are introduced  
286 in the curve (Figure 1). This allows the integration of pressure to derive the concept of  
287 wasted work. Following Butcher's pioneering application of myocardial work analysis  
288 to the RV, many teams have validated non-invasive RVMW in various diseases<sup>23-25</sup>.  
289 Our team was the first to apply RVMW in a HFpEF population confirmed with iCPET,  
290 and found that RV GWW effectively explained and predicted changes in exercise  
291 PCWP.

292 Due to the difficulty in obtaining ideal tricuspid regurgitation doppler envelope  
293 in our patient population, we adopted a semi-invasive rather than a fully non-invasive  
294 approach to perform RVMW analysis. Future improvements in non-invasive RVMW  
295 analysis could come from establishing RV pressure reference curves and using  
296 ultrasound contrast agents to optimize RV free wall tracking ability and doppler signal  
297 quality.

298 ***Superiority of RVMW over other parameters of RV and pulmonary circulation (Pc)***

299 *uncoupling*

300 PCWP is an essential hemodynamic parameter in HFpEF, reflecting left  
301 ventricular diastolic function and influencing symptoms and prognosis in affected  
302 patients. Elevated PCWP can increase RV afterload, making the RV stiffer and  
303 impairing its filling and contractile properties, leading to uncoupling with pulmonary  
304 circulation.<sup>26</sup> Pressure-strain loops theoretically provide a more comprehensive  
305 evaluation of RV function through the calculation of RVMW indices, compared to  
306 standard echocardiographic measures.<sup>11</sup> Unlike RV longitudinal strain, TAPSE, and  
307 RV FAC, RVMW parameters incorporate contractility, RV dyssynchrony, and  
308 pulmonary pressures into their assessment.<sup>15</sup> This comprehensive evaluation of RV  
309 function is not affected by the technical limitations present in other standard  
310 parameters. TAPSE's measurement is influenced by angle and load and varies with  
311 cardiac translation, while RV FAC's reliability is hindered by increased load  
312 dependency and only modest interobserver reproducibility.<sup>27</sup> RV longitudinal strain is  
313 affected by afterload. By accounting for afterload in the assessment, RVMW provides  
314 insight into RV-pulmonary arterial coupling, potentially offering a more accurate  
315 evaluation of PCWP and LVEDP.<sup>15</sup> RVMW integrates RV dyssynchrony and  
316 post-systolic shortening into the evaluation of RV function by synchronizing  
317 pulmonic and tricuspid valvular events with RV longitudinal strain. For patients with

318 HFpEF, both cardiac and extracardiac components contribute to limited exercise  
319 capacity, which can lead to RV and Pc uncoupling, dyssynchronous left-to-right delay,  
320 and ventricular interdependence.<sup>11,20,22,28</sup> In patients with HFrEF, RVGCW  
321 demonstrated a moderate correlation with invasively measured stroke volume and  
322 stroke volume index.<sup>15</sup> Additionally, RV global wasted work (RV GWW) represents  
323 myocardial lengthening during systole and shortening during isovolumic relaxation,  
324 which do not contribute to RV constructive work. Our study showed that increased  
325 RV GWW improves the diagnostic accuracy of HFpEF and moderately correlates  
326 with PCWP, though it is not related to stroke volume and cardiac index.

### 327 *Clinical implication*

328 Among myocardial work metrics, LVGCW was found to be a superior indicator  
329 of exercise capacity compared to global longitudinal strain in a cohort of 114 patients  
330 with HFpEF. The increase in LVGCW observed during exercise in patients treated  
331 with spironolactone for six months is believed to correlate with improvements in  
332 functional capacity.<sup>29</sup> RVGCW, derived from non-invasive assessment, emerges as a  
333 superior parameter, offering an integrated analysis of RV systolic function. It  
334 correlates more strongly with invasively measured stroke volume and stroke volume  
335 index compared to other standard echocardiographic parameters.<sup>15</sup> In this study, we  
336 have demonstrated that RVMW parameters provide a comprehensive assessment of

337 PCWP and  $\Delta$ PCWP during exercise in individuals with HFpEF. By combining RV  
338 strain with invasive right heart catheterization for strain-pressure loop analysis, we  
339 can effectively characterize various RV pathologies and regional RV myocardial  
340 energetics in HFpEF. Our findings highlight the impact of increased LVEDP and  
341 PCWP on RV dyssynchrony, ventricular interdependence, and wasted RV work.  
342 Additionally, the novel parameter RVGWW could predict the rise in PCWP during  
343 exercise and explain the exercise intolerance observed in HFpEF patients. Our  
344 approach suggests that the need for exercise testing may be eliminated while  
345 maintaining the accuracy of HFpEF diagnosis.

#### 346 *Limitations*

347 The major limitation of this proof-of-concept study is that the pressure-strain  
348 analysis utilized is not based on current commercial software. Consequently, our  
349 approach is not entirely non-invasive, as RV pressure recordings still depend on  
350 measurements obtained from a Swan-Ganz catheter. Currently available commercial  
351 software enables the non-invasive assessment of LV myocardial work from the  
352 estimated LV pressure-time curve via adjusting the empiric reference LV pressure  
353 curve. The crucial step is to use measured systolic and diastolic blood pressures from  
354 a sphygmomanometer and to use echocardiography derived isovolumic contraction  
355 time (IVCT), ejection time, and isovolumic relaxation time (IVRT) for the simulation

356 of an individualized LV pressure-time curves.

357

358 For the RV, such dedicated empiric reference ventricular pressure curve is  
359 lacking<sup>30</sup>. On the other hand, as the typical RV pressure-volume curve is triangular  
360 but not rectangular<sup>31</sup>, it is hard to precisely define the IVCT and IVRT of RV. In  
361 conditions such as pulmonary hypertension or severe left heart congestion, the RV  
362 pressure-volume curve can somewhat like their left counterpart, and the adoption of  
363 the commercial LV myocardial work analysis software might be feasible. Butcher and  
364 colleagues have successfully demonstrated that the RV GWW were significantly  
365 higher in HFrEF and pulmonary hypertension patients via such non-invasive  
366 pressure-strain analysis<sup>15,32</sup>. However, it is difficult to perform a satisfactory  
367 non-invasive RV pressure estimation in our HFpEF patients. Instead, we used ECG  
368 signals as a reference to conjugate the invasive pressure curve and the non-invasive  
369 strain curves for pressure-strain analysis. The applicability of our approach to other  
370 pathophysiological conditions, such as HFrEF, mitral valve disease, aortic valve  
371 disease, or pulmonary arterial hypertension, remains to be validated in subsequent  
372 studies.

373

374 **CONCLUSION**



375 We developed a vendor-independent semi-invasive myocardial work analysis  
376 method by combining RV strain with RV pressure recordings and validated it using  
377 iCPET-confirmed HFpEF. Our findings indicate that RV GWW not only effectively  
378 predicts HFpEF but also better predicts exercise PCWP and post-exercise  $\Delta$ PCWP  
379 compared to other standard echocardiographic parameters in HFpEF.

380

### 381 **Declarations**

#### 382 Data Availability Statement

383 No new data were generated or analyzed in support of this research. The datasets used  
384 in this study were only available in the National Taiwan University Hospital.

385 Ethics approval and consent to participate

386 The study protocol complies with the Declaration of Helsinki and was approved by  
387 the Institutional Review Board of National Taiwan University Hospital (IRB  
388 201908057RINC).

389

390 Consent for publication

391 Not applicable.

392

393 Conflict of interest

394 The authors declare that they have no conflicts of interest.

395

396 Funding

397 This work was supported by the National Science Council, Taiwan (grant no.

398 107-2314-B-002-265-MY3) and National Science and Technology Council (NSTC

399 112-2628-B-002 -029 -MY3 and 112-2314-B-002 -277 -MY3). The funders had no

400 role in study design, data collection and analysis, decision to publish, or preparation

401 of the manuscript.

402

403 Authors' contributions

404 TT-L and LY-L contributed to the conception or design of the work and analyzed data.

405 LY-L, CK-W, and KC-H contributed to the acquisition of data for the work. KC-H and

406 TT-L drafted and revised the manuscript. TT-L and CK-W critically revised the

407 manuscript. All gave final approval and agreed to be accountable for all aspects of

408 work ensuring integrity and accuracy.

409

410

411

412

413

## 414 **References**

- 415 1. Borlaug BA. Evaluation and management of heart failure with preserved  
416 ejection fraction. *Nat Rev Cardiol*. 2020;17:559-573. doi:  
417 10.1038/s41569-020-0363-2
- 418 2. Guazzi M, Dixon D, Labate V, Beussink-Nelson L, Bandera F, Cuttica MJ, Shah  
419 SJ. RV Contractile Function and its Coupling to Pulmonary Circulation in Heart  
420 Failure With Preserved Ejection Fraction: Stratification of Clinical Phenotypes  
421 and Outcomes. *JACC Cardiovasc Imaging*. 2017;10:1211-1221. doi:  
422 10.1016/j.jcmg.2016.12.024
- 423 3. Lam CS, Roger VL, Rodeheffer RJ, Borlaug BA, Enders FT, Redfield MM.  
424 Pulmonary hypertension in heart failure with preserved ejection fraction: a  
425 community-based study. *J Am Coll Cardiol*. 2009;53:1119-1126. doi:  
426 10.1016/j.jacc.2008.11.051
- 427 4. Melenovsky V, Hwang SJ, Lin G, Redfield MM, Borlaug BA. Right heart  
428 dysfunction in heart failure with preserved ejection fraction. *Eur Heart J*.  
429 2014;35:3452-3462. doi: 10.1093/eurheartj/ehu193
- 430 5. Borlaug BA, Nishimura RA, Sorajja P, Lam CS, Redfield MM. Exercise  
431 hemodynamics enhance diagnosis of early heart failure with preserved  
432 ejection fraction. *Circ Heart Fail*. 2010;3:588-595. doi:  
433 10.1161/circheartfailure.109.930701
- 434 6. Eisman AS, Shah RV, Dhakal BP, Pappagianopoulos PP, Wooster L, Bailey C,  
435 Cunningham TF, Hardin KM, Baggish AL, Ho JE, et al. Pulmonary Capillary  
436 Wedge Pressure Patterns During Exercise Predict Exercise Capacity and  
437 Incident Heart Failure. *Circ Heart Fail*. 2018;11:e004750. doi:  
438 10.1161/circheartfailure.117.004750
- 439 7. Ahlgrim C, Kocher S, Minners J, Jander N, Savarese G, Neumann FJ, Arentz T,  
440 Jadidi A, Mueller-Edenborn B. Pulmonary Capillary Wedge Pressure during  
441 Exercise Is Prognostic for Long-Term Survival in Patients with Symptomatic  
442 Heart Failure. *J Clin Med*. 2022;11. doi: 10.3390/jcm11195901
- 443 8. Dorfs S, Zeh W, Hochholzer W, Jander N, Kienzle RP, Pieske B, Neumann FJ.  
444 Pulmonary capillary wedge pressure during exercise and long-term mortality  
445 in patients with suspected heart failure with preserved ejection fraction. *Eur*  
446 *Heart J*. 2014;35:3103-3112. doi: 10.1093/eurheartj/ehu315
- 447 9. Cheng JF, Huang PS, Chen ZW, Huang CY, Lan CW, Chen SY, Lin LY, Wu CK.  
448 Post-exercise left atrial conduit strain predicted hemodynamic change in  
449 heart failure with preserved ejection fraction. *Eur Radiol*. 2024;34:1825-1835.  
450 doi: 10.1007/s00330-023-10142-z

- 451 10. Russell K, Eriksen M, Aaberge L, Wilhelmsen N, Skulstad H, Remme EW,  
452 Haugaa KH, Opdahl A, Fjeld JG, Gjesdal O, et al. A novel clinical method for  
453 quantification of regional left ventricular pressure-strain loop area: a  
454 non-invasive index of myocardial work. *Eur Heart J*. 2012;33:724-733. doi:  
455 10.1093/eurheartj/ehs016
- 456 11. Moya A, Buytaert D, Penicka M, Bartunek J, Vanderheyden M.  
457 State-of-the-Art: Noninvasive Assessment of Left Ventricular Function  
458 Through Myocardial Work. *J Am Soc Echocardiogr*. 2023;36:1027-1042. doi:  
459 10.1016/j.echo.2023.07.002
- 460 12. Smiseth OA, Larsen CK. Finding the "Golden Moment" for TAVR: Look Below  
461 the Valve. *JACC Cardiovasc Imaging*. 2020;13:2573-2575. doi:  
462 10.1016/j.jcmg.2020.08.018
- 463 13. Walker LA, Buttrick PM. The right ventricle: biologic insights and response to  
464 disease. *Curr Cardiol Rev*. 2009;5:22-28. doi: 10.2174/157340309787048077
- 465 14. MacNee W. Pathophysiology of cor pulmonale in chronic obstructive  
466 pulmonary disease. Part One. *Am J Respir Crit Care Med*. 1994;150:833-852.  
467 doi: 10.1164/ajrccm.150.3.8087359
- 468 15. Butcher SC, Fortuni F, Montero-Cabezas JM, Abou R, El Mahdiui M, van der  
469 Bijl P, van der Velde ET, Ajmone Marsan N, Bax JJ, Delgado V. Right ventricular  
470 myocardial work: proof-of-concept for non-invasive assessment of right  
471 ventricular function. *Eur Heart J Cardiovasc Imaging*. 2021;22:142-152. doi:  
472 10.1093/ehjci/jeaa261
- 473 16. Marzlin N, Hays AG, Peters M, Kaminski A, Roemer S, O'Leary P, Kroboth S,  
474 Harland DR, Khandheria BK, Tajik AJ, et al. Myocardial Work in  
475 Echocardiography. *Circ Cardiovasc Imaging*. 2023;16:e014419. doi:  
476 10.1161/circimaging.122.014419
- 477 17. Borlaug BA, Koepp KE, Melenovsky V. Sodium Nitrite Improves Exercise  
478 Hemodynamics and Ventricular Performance in Heart Failure With Preserved  
479 Ejection Fraction. *J Am Coll Cardiol*. 2015;66:1672-1682. doi:  
480 10.1016/j.jacc.2015.07.067
- 481 18. Wu CK, Cheng JF, Huang CY, Chen ZW, Chen SY, Lin LY. Iloprost and exercise  
482 haemodynamics in heart failure with preserved ejection fraction—the ILO-  
483 HOPE randomised controlled trial. *British Journal of Clinical Pharmacology*.  
484 2020;87:1165-1174. doi: 10.1111/bcp.14484
- 485 19. Verbeke J, Calle S, Kamoen V, De Buyzere M, Timmermans F. Prognostic value  
486 of myocardial work and global longitudinal strain in patients with heart failure  
487 and functional mitral regurgitation. *Int J Cardiovasc Imaging*. 2021. doi:  
488 10.1007/s10554-021-02474-y

- 489 20. Guazzi M, Wilhelm M, Halle M, Van Craenenbroeck E, Kemps H, de Boer RA,  
490 Coats AJS, Lund L, Mancini D, Borlaug B, et al. Exercise testing in heart failure  
491 with preserved ejection fraction: an appraisal through diagnosis,  
492 pathophysiology and therapy - A clinical consensus statement of the Heart  
493 Failure Association and European Association of Preventive Cardiology of the  
494 European Society of Cardiology. *Eur J Heart Fail.* 2022;24:1327-1345. doi:  
495 10.1002/ejhf.2601
- 496 21. López-Candales A, Rajagopalan N, Gulyasy B, Edelman K, Bazaz R. A delayed  
497 time of the peak tricuspid regurgitation signal: marker of right ventricular  
498 dysfunction. *Am J Med Sci.* 2008;336:224-229. doi:  
499 10.1097/MAJ.0b013e31815fa56a
- 500 22. Marcus JT, Gan CT, Zwanenburg JJ, Boonstra A, Allaart CP, Götte MJ,  
501 Vonk-Noordegraaf A. Interventricular mechanical asynchrony in pulmonary  
502 arterial hypertension: left-to-right delay in peak shortening is related to right  
503 ventricular overload and left ventricular underfilling. *J Am Coll Cardiol.*  
504 2008;51:750-757. doi: 10.1016/j.jacc.2007.10.041
- 505 23. Berg-Hansen K, Gopalasingam N, Clemmensen TS, Andersen MJ, Mellemkjaer  
506 S, Poulsen SH, Jensen JK, Nielsen R. Myocardial work across different  
507 etiologies of right ventricular dysfunction and healthy controls. *Int J*  
508 *Cardiovasc Imaging.* 2024;40:675-684. doi: 10.1007/s10554-023-03038-y
- 509 24. Lakatos BK, Rako Z, Szijarto A, da Rocha BRB, Richter MJ, Fabian A, Gall H,  
510 Ghofrani HA, Kremer N, Seeger W, et al. Right ventricular pressure-strain  
511 relationship-derived myocardial work reflects contractility: Validation with  
512 invasive pressure-volume analysis. *J Heart Lung Transplant.* 2024. doi:  
513 10.1016/j.healun.2024.03.007
- 514 25. Wu J, Huang X, Chen W, Tang Y, Chen X, Wang X, Jing B, Sun Y, Huang K, Gao Q,  
515 et al. Noninvasive right ventricular work in patients with atrial septal defects:  
516 a proof-of-concept study. *Cardiovasc Ultrasound.* 2023;21:10. doi:  
517 10.1186/s12947-023-00306-8
- 518 26. Guazzi M, Naeije R. Right Heart Phenotype in Heart Failure With Preserved  
519 Ejection Fraction. *Circ Heart Fail.* 2021;14:e007840. doi:  
520 10.1161/circheartfailure.120.007840
- 521 27. Lang RM, Badano LP, Mor-Avi V, Afilalo J, Armstrong A, Ernande L,  
522 Flachskampf FA, Foster E, Goldstein SA, Kuznetsova T, et al. Recommendations  
523 for cardiac chamber quantification by echocardiography in adults: an update  
524 from the American Society of Echocardiography and the European  
525 Association of Cardiovascular Imaging. *Eur Heart J Cardiovasc Imaging.*  
526 2015;16:233-270. doi: 10.1093/ehjci/jev014

- 527 28. Badagliacca R, Poscia R, Pezzuto B, Papa S, Gambardella C, Francone M,  
528 Mezzapesa M, Nocioni M, Nona A, Rosati R, et al. Right ventricular  
529 dyssynchrony in idiopathic pulmonary arterial hypertension: determinants  
530 and impact on pump function. *J Heart Lung Transplant*. 2015;34:381-389. doi:  
531 10.1016/j.healun.2014.06.010
- 532 29. Przewlocka-Kosmala M, Marwick TH, Mysiak A, Kosowski W, Kosmala W.  
533 Usefulness of myocardial work measurement in the assessment of left  
534 ventricular systolic reserve response to spironolactone in heart failure with  
535 preserved ejection fraction. *Eur Heart J Cardiovasc Imaging*.  
536 2019;20:1138-1146. doi: 10.1093/ehjci/jez027
- 537 30. Smiseth OA, Aalen JM. Right ventricular work: a step forward for non-invasive  
538 assessment of right ventricular function. *Eur Heart J Cardiovasc Imaging*.  
539 2021;22:153-154. doi: 10.1093/ehjci/jeaa296
- 540 31. Sheehan F, Redington A. The right ventricle: anatomy, physiology and clinical  
541 imaging. *Heart*. 2008;94:1510-1515. doi: 10.1136/hrt.2007.132779
- 542 32. Butcher SC, Feloukidis C, Kamperidis V, Yedidya I, Stassen J, Fortuni F, Vrana E,  
543 Mouratoglou SA, Boutou A, Giannakoulas G, et al. Right Ventricular  
544 Myocardial Work Characterization in Patients With Pulmonary Hypertension  
545 and Relation to Invasive Hemodynamic Parameters and Outcomes. *Am J*  
546 *Cardiol*. 2022;177:151-161. doi: 10.1016/j.amjcard.2022.04.058

547

548

549 **Figure legend**

550

551 **Figure 1. Method of Semi-Invasive Myocardial Work Analysis**

552 Right ventricular (RV) strain curves (red) and RV strain rate curves (blue) are  
553 exported from dedicated software. RV pressure recordings obtained via a Swan-Ganz  
554 catheter, along with ECG signals, are averaged to create a single cardiac cycle RV  
555 pressure curve (from ECG R wave to R wave). Both the strain rate and RV pressure  
556 curves are resampled and then multiplied to generate the RV power curve. The  
557 positive area under the RV power curve represents constructive work (green), while  
558 the negative area represents wasted work (brown).

559

560 **Figure 2. Right Ventricular Myocardial Work Analysis**

561 Curves of RV pressure (yellow), RV strain (red), inversed RV strain rate (blue)  
562 and RV power (black) are plotted together for a heart failure with preserved ejection  
563 fraction (HFpEF) patient (right) and a non-HFpEF patient (left). Peak pressure and  
564 peak RV shortening are delayed and the RV wasted work (the negative area of the RV  
565 power curve) is more in the HFpEF patient.

566

567 **Figure 3. Correlation of RVGWW with Parameters from Invasive**

568 **Cardiopulmonary Exercise Test**

569 Significant correlations between RVGWW and invasively derived rest PCWP, as  
570 well as post-exercise  $\Delta$ PCWP, are evident. However, no significant correlations are  
571 observed with stroke volume index and cardiac index.

572

573 **Central illustration**

574 Right Ventricular Myocardial Work in Heart Failure with Preserved Ejection Fraction.

575 Right ventricle global waste work (RVGWW) is significantly increased in HFpEF

576 patients and correlated with the change of PCWP at peak exercise.

577 Abbreviations :

578 HFpEF, heart failure with preserved ejection fraction; iCPET, invasive

579 cardiopulmonary exercise test; RV, right ventricle; PCWP, pulmonary capillary wedge

580 pressure.

581

582 **Supplemental Figure 1. The Patient Enrollment Algorithm**

583

584



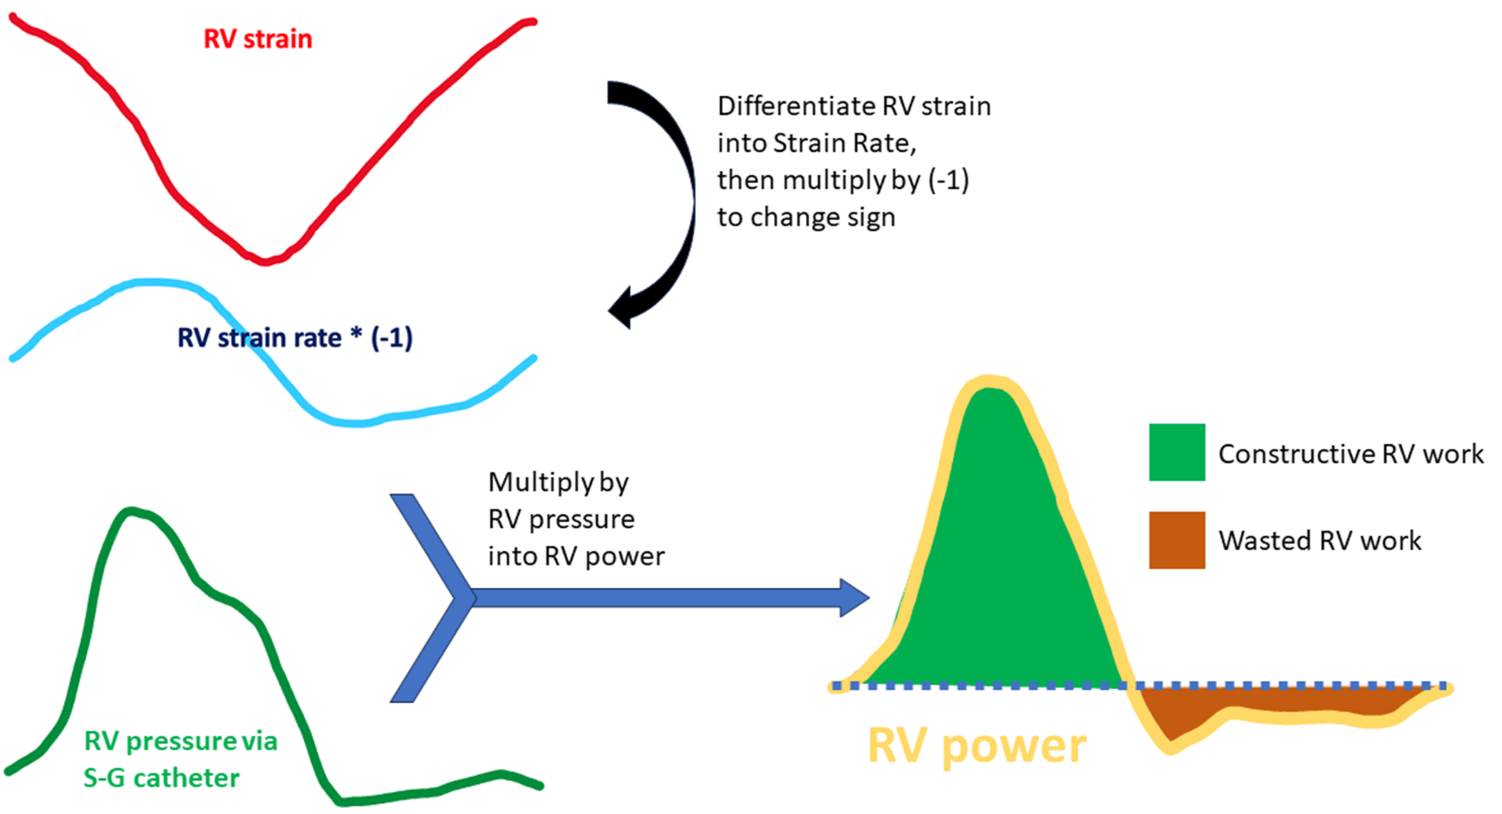

## Non HFpEF

## HFpEF

Similar GCW  
More GWW  
Lower GWE

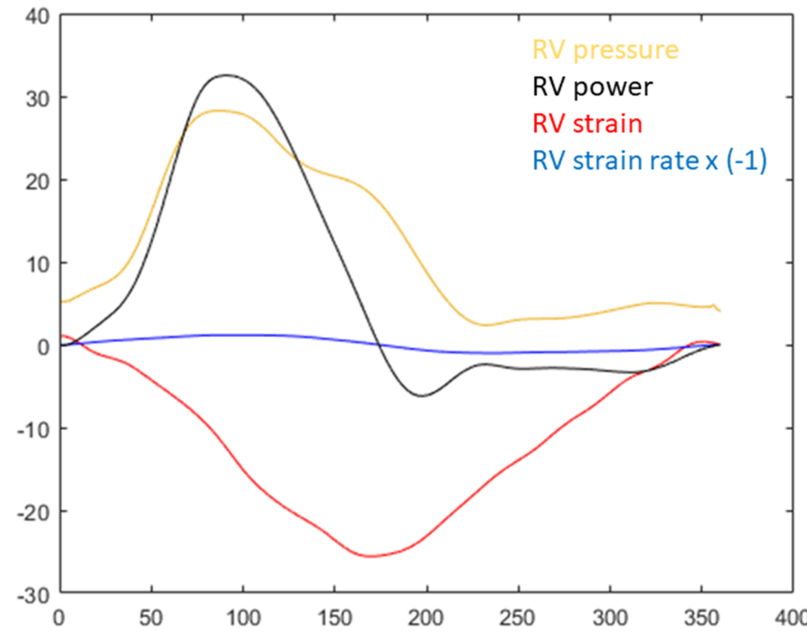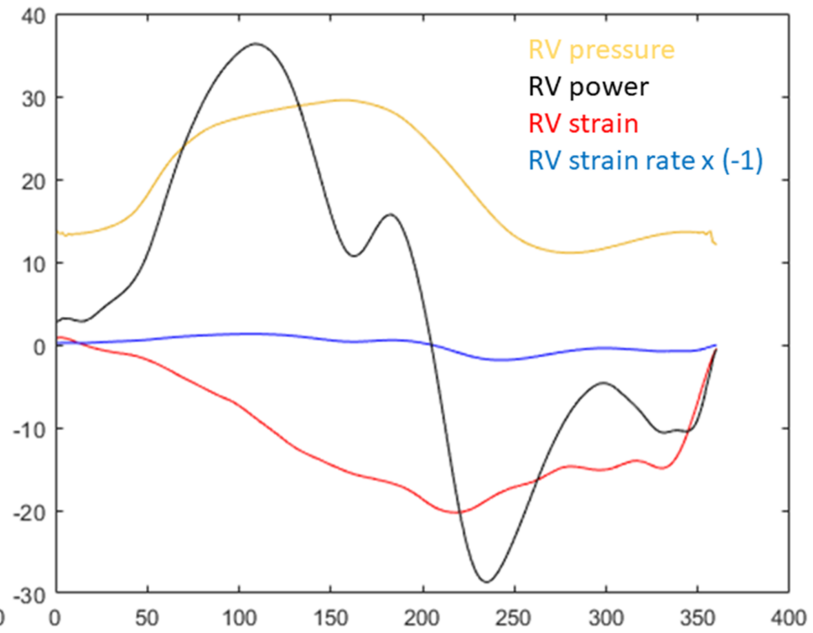

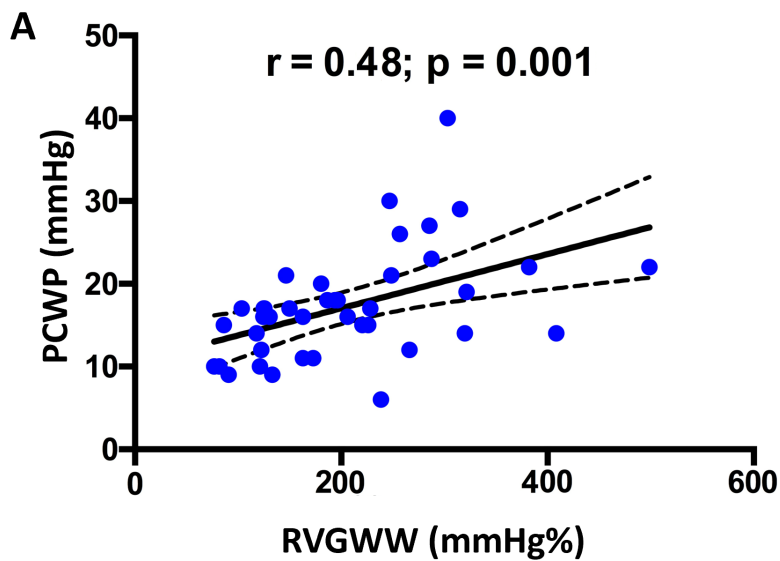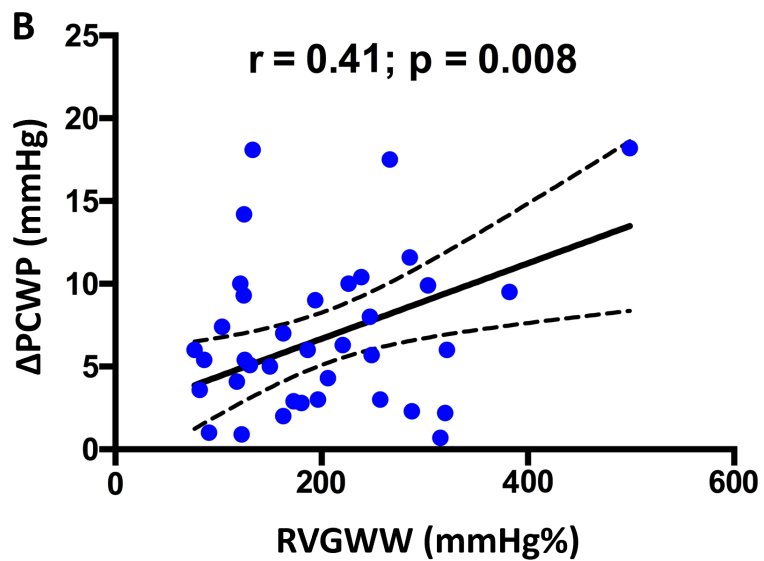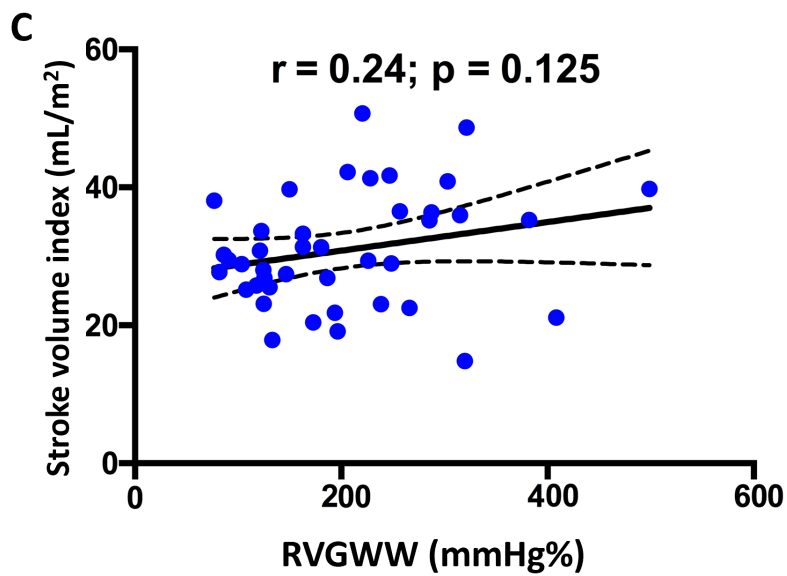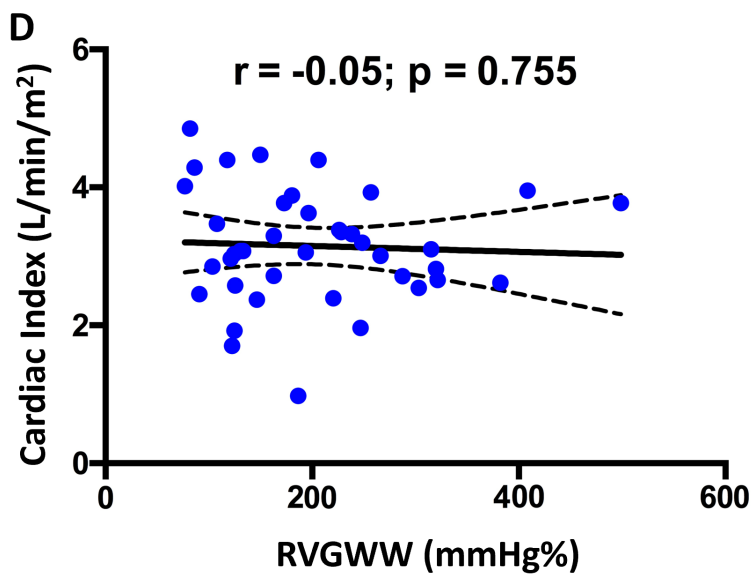

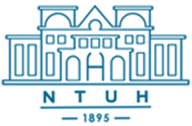

NTUH iCPET cohort

Echo RV strain

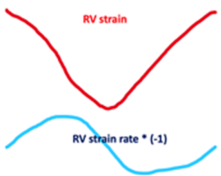

RV pressure tracing

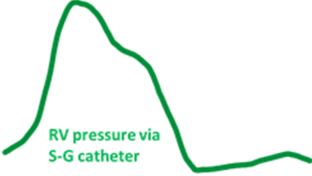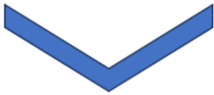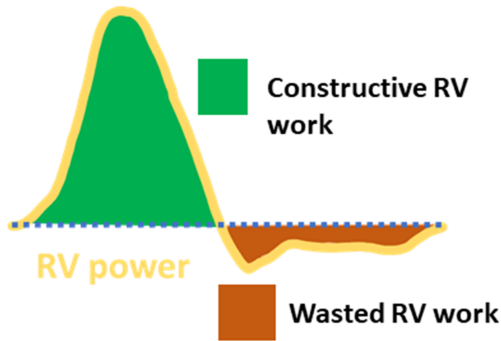

**HFpEF (N=21)**  
resting PCWP >15mmHg or peak exercise PCWP > 25mmHg

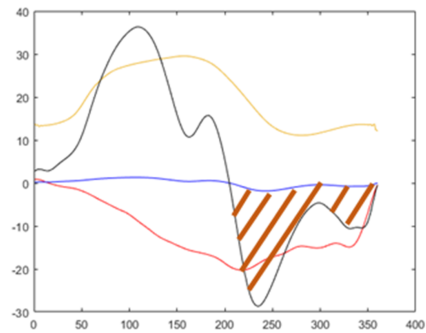

**Non-HFpEF (N=20)**

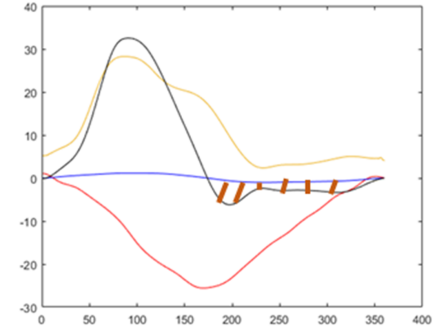

More RV global waste work (RVGWW) in HFpEF than control

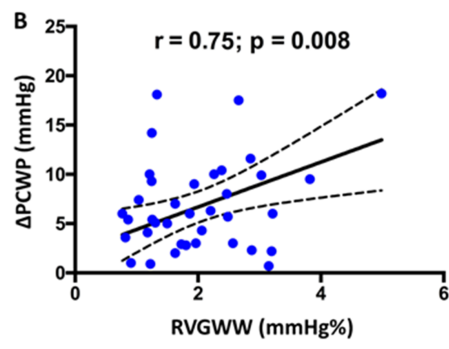

RVGWW significantly correlated with the  $\Delta$ PCWP at peak exercise

Table 1. Patient characteristics

|                         | Non-HFpEF patients | HFpEF patients | p    |
|-------------------------|--------------------|----------------|------|
| n                       | 20                 | 21             |      |
| age                     | 68.3±6.6           | 65.8±11.3      | 0.40 |
| Sex                     | 9/20               | 9/21           | 0.89 |
| BMI                     | 25.6±3.9           | 26.3±3.8       | 0.56 |
| BSA                     | 1.70±0.16          | 1.72±0.19      | 0.82 |
| H2FPEF score            | 2.10               | 2.33           | 0.57 |
| Comorbidities           |                    |                |      |
| Coronary artery disease | 10 (50)            | 11 (48)        | 0.88 |
| Hypertension            | 16 (80)            | 13 (62)        | 0.20 |
| Dyslipidemia            | 10 (50)            | 10 (48)        | 0.88 |
| Diabetes mellitus       | 5 (25)             | 5 (23)         | 0.92 |
| Medications             |                    |                |      |
| ACEI or ARB             | 7 (35)             | 5 (23)         | 0.43 |
| Betablocker             | 10 (50)            | 13 (62)        | 0.26 |
| CCB                     | 4 (20)             | 3 (14)         | 0.73 |

|              |             |              |      |
|--------------|-------------|--------------|------|
| statin       | 8 (40)      | 9 (43)       | 0.65 |
| Diuretics    | 4 (20)      | 2 (10)       | 0.41 |
| Nitrate      | 4 (20)      | 3 (14)       | 0.73 |
| Laboratories |             |              |      |
| Hemoglobin   | 13.7±0.9    | 13.5±1.5     | 0.63 |
| NT-proBNP    | 109.1±133.2 | 389.6±1076.3 | 0.25 |
| HbA1bac      | 6.0±1.1     | 5.9±0.6      | 0.84 |
| LDL          | 100.9±32.6  | 103.5±31.3   | 0.80 |

ACEI, angiotensin-converting enzyme inhibitors; ARB, angiotensin receptor blockers;

BMI, body mass index; BSA, body surface area; CCB, calcium channel blocker;

HFpEF, heart failure with preserved ejection fraction; LDL, low density lipoprotein;

NT-proBNP, N-terminal pro- brain natriuretic peptide;

Table 2. Echocardiographic and hemodynamic parameters

|                                | Non-HFpEF patients | HFpEF patients | p     |
|--------------------------------|--------------------|----------------|-------|
| n                              | 20                 | 21             |       |
| Rest PCWP                      | 12.9±3.4           | 21.2±6.4       | <0.01 |
| Exercise PCWP                  | 18.9±4.6           | 28.6±8.2       | <0.01 |
| Mean PAP (rest)                | 20.5±4.9           | 28.1±7.4       | <0.01 |
| Mean PAP (ex)                  | 32.1±8.2           | 39.6±8.5       | <0.01 |
| Resting cardiac output (L/min) | 5.5±1.2            | 5.2±1.5        | 0.45  |
| LVEDV (ml)                     | 74.3±22.6          | 86.2±20.0      | 0.08  |
| LVEDVi                         | 43.3±11.2          | 50.6±12.7      | 0.057 |
| LVEF (%)                       | 65.4±7.3           | 66.7±8.1       | 0.57  |
| LVGLS (%)                      | 20.2±11.3          | 22.7±3.1       | 0.33  |
| Mean E/e'                      | 9.3±2.4            | 11.3±4.8       | 0.11  |
| LAV (ml)                       | 47.1±14.3          | 52.1±21.3      | 0.38  |
| LAVi                           | 27.4±6.7           | 30.4±11.8      | 0.32  |
| LASr (%)                       | 44.7±8.2           | 39.1±11.3      | 0.07  |
| LASc (%)                       | 22.3±6.7           | 20.3±7.0       | 0.35  |

|                          |             |             |       |
|--------------------------|-------------|-------------|-------|
| LASb (%)                 | 22.4±7.4    | 18.7±7.3    | 0.12  |
| RVEDA (cm <sup>2</sup> ) | 15.9±4.1    | 16.9±4.3    | 0.44  |
| RVEDA <sub>i</sub>       | 9.4±2.1     | 9.9±2.2     | 0.44  |
| RVFAC (%)                | 41.3±5.5    | 38.3±9.7    | 0.25  |
| RVGLS (%)                | 23.9±2.9    | 22.8±4.7    | 0.39  |
| RVFWS (%)                | 27.5±3.9    | 25.8±5.4    | 0.29  |
| PASP (mmHg)              | 23.3±7.2    | 22.6±8.7    | 0.76  |
| RVFWS/PASP<br>(%/mmHg)   | 1.3±0.6     | 1.4±1.0     | 0.73  |
| TAPSE (cm)               | 2.3±0.4     | 2.4±0.5     | 0.53  |
| TAPSE/PASP<br>(mm/mmHg)  | 0.10±0.07   | 0.11±0.3    | 0.57  |
| RV GCW (mmHg%)           | 490.1±118.9 | 547.6±229.1 | 0.33  |
| RV GWW<br>(mmHg%)        | 149.6±63.3  | 255.6±96.0  | <0.01 |
| RV GWE (%)               | 76.9±6.7    | 67.7±6.8    | <0.01 |

E, early mitral inflow velocity; e', early mitral annulus velocity; EDV, end-diastolic volume; EDA, end-diastolic area; FAC, fractional area change; GCW, global constructive work; GLS, global longitudinal strain; GWW, global waste work; GWE,



global waste efficiency; LA, left atrium; LAESV, left atrial end-systolic volume;  
LASr, left atrial reservoir strain; LASc, left atrial conduit strain; LASb, left atrial  
booster strain; LAV, left atrial volume; LV, left ventricle; LVEF, left ventricular  
ejection fraction; PAP, catheter pulmonary arterial pressure; PASP, pulmonary artery  
systolic pressure (echo); PCWP, pulmonary capillary wedge pressure; RV, right  
ventricle; RVFWS, right ventricular free wall longitudinal strain; TAPSE, tricuspid  
annular plane systolic excursion;

Table 3. Prediction of HFpEF with echocardiographic parameters

| HFpEF         | AUC  | 95% C.I.  | Sensitivity (%) | Specificity (%) | Diagnostic accuracy (%) | Cut-off |
|---------------|------|-----------|-----------------|-----------------|-------------------------|---------|
| RVGWW         | 0.85 | 0.73-0.97 | 95              | 57              | 92                      | 173     |
| RVGWE         | 0.83 | 0.70-0.96 | 80              | 86              | 84                      | 74      |
| RVGCW         | 0.59 | 0.41-0.77 | 50              | 76              | 67                      | 453     |
| Averaged E/e' | 0.59 | 0.41-0.77 | 55              | 42              | 43                      | 10.3    |
| E/A           | 0.5  | 0.31-0.69 | 60              | 40              | 52                      | 0.88    |
| LASr          | 0.64 | 0.47-0.81 | 90              | 38.1            | 58                      | 35      |
| LAVi          | 0.57 | 0.39-0.75 | 70              | 24              | 55                      | 31.5    |
| RVFAC         | 0.61 | 0.43-0.79 | 80              | 52              | 54                      | 37.2    |
| RVFWS         | 0.60 | 0.42-0.79 | 85              | 52              | 50                      | 24.6    |

|            |      |           |      |    |    |      |
|------------|------|-----------|------|----|----|------|
| TAPSE/PASP | 0.50 | 0.30-0.70 | 88.2 | 40 | 62 | 0.23 |
| RVFWS/PASP | 0.52 | 0.33-0.7  | 40   | 75 | 61 | 1.35 |

Abbreviations as in Table 2

Table 4. Multivariate regression analyses with post-exercise  $\Delta$ PCWP and exercise

PCWP as the dependent variables

|            | Post-exercise $\Delta$ PCWP |              |         | exercise PCWP    |              |         |
|------------|-----------------------------|--------------|---------|------------------|--------------|---------|
|            | $\beta$ (95% CI)            |              | p value | $\beta$ (95% CI) |              | p value |
| RV<br>GWW* | 1.981                       | 0.056~3.906  | 0.044   | 4.323            | 2.429~6.218  | <0.001  |
| age        | 0.033                       | -0.186~0.253 | 0.759   | 0.036            | -0.178~0.250 | 0.734   |
| LVGLS      | -0.007                      | -0.216~0.202 | 0.945   | 0.122            | 0.081~0.325  | 0.229   |
| LAVi       | 0.026                       | -0.180~0.232 | 0.799   | 0.130            | -0.078~0.337 | 0.209   |
| LASc       | 0.284                       | -0.163~0.365 | 0.443   | -0.145           | -0.115~0.405 | 0.263   |
| Mean E/e'  | -0.101                      | -0.184~0.752 | 0.226   | 0.918            | 0.463~1.373  | <0.001  |

Abbreviations as in Table 2; \* $\beta$  value per 100 mmHg
